# Supplementary material for: Immune Responses after Vascular Photodynamic Therapy with Redaporfin
Source: PubMed Central journal article supplement (PMC7027008; doi:10.3390/jcm9010104), 2019-12-31
Supplement: jcm-09-00104-s001.pdf [file jcm-09-00104-s001.pdf]

**Supplementary Materials:** The following are available online at [www.mdpi.com/xxx/s1](http://www.mdpi.com/xxx/s1), Figure S1. *In vivo* neutrophil depletion was confirmed by flow cytometry, Figure S2. *In vivo* CD4<sup>+</sup> and CD8<sup>+</sup> T cell neutralization was confirmed by flow cytometry.

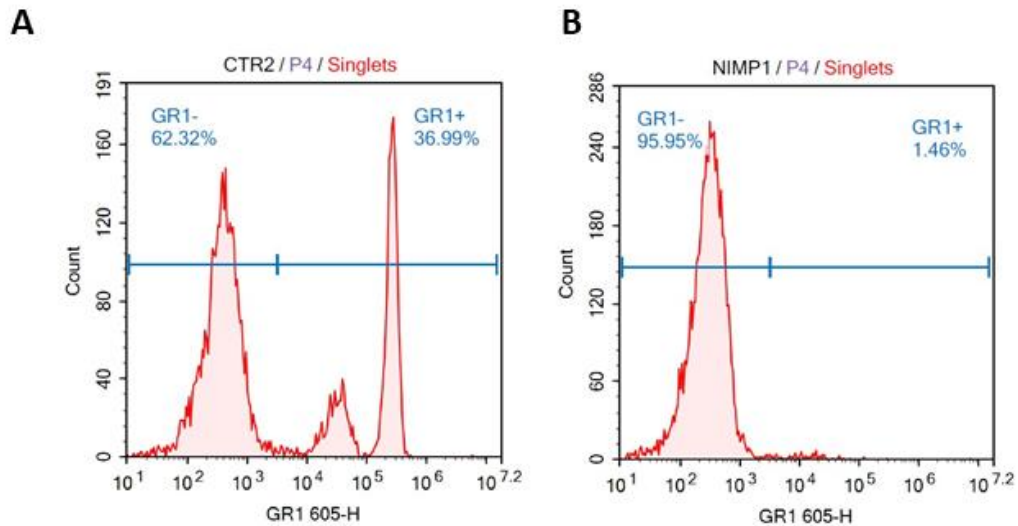

**Figure S1.** *In vivo* neutrophil depletion was confirmed by flow cytometry. Neutrophils depletion was attained with ip administrations of anti-mouse Ly6G/Ly6C monoclonal antibodies (NIMP-R14, BioXcell). Blood samples were collected by tail vein puncture 24 h after the first administration and neutropenia was confirmed by flow cytometry. (A,B) Representative histograms that show the neutrophils level (Gr1<sup>+</sup> cells) of a control and a neutrophil depleted animal, respectively.

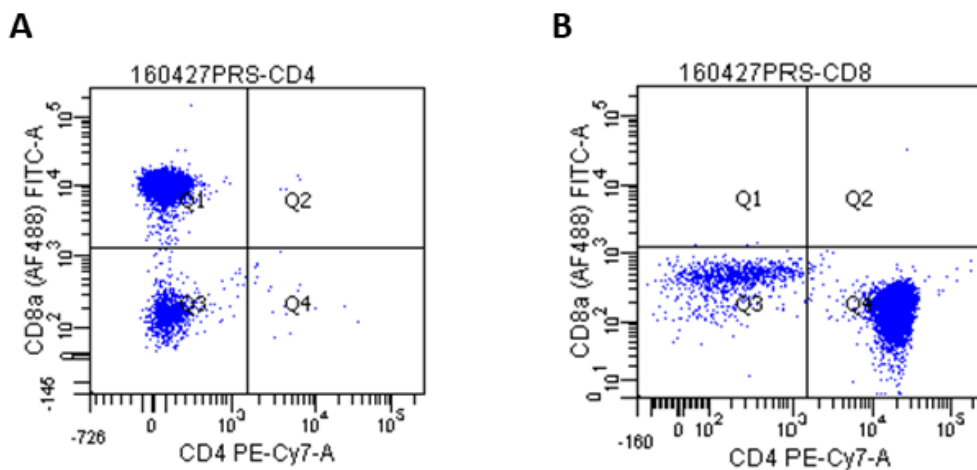

**Figure S2.** *In vivo* CD4<sup>+</sup> and CD8<sup>+</sup> T cell neutralization was confirmed by flow cytometry. Neutralization of CD4<sup>+</sup>, CD8<sup>+</sup> were achieved with regular ip administration of anti-mouse CD4 (GK1.5, BioXcell) and CD8 (53-6.7, BioXcell) monoclonal antibodies, respectively. Specific depletion was confirmed by flow cytometry of blood samples collected 24 h after the first administration. (A,B) Representative dot plots that show the effective depletion of CD4<sup>+</sup> T and CD8<sup>+</sup> T cells populations, respectively.
